# Supplementary material for: Employment Support Needs of People with Schizophrenia: A Scoping Study
Source: Springer Nature journal article supplement (doi:10.1007/s10926-018-9771-0), 2018-04-21
Supplement: MOESM1 [file 15711716]

Employment support needs of people with schizophrenia: A scoping study

Journal of Occupational Rehabilitation

Viviana R. Carmonaa, Juana Gómez-Benito*a, b, J. Emilio Rojo-Rodesc, d

aDepartment of Social Psychology and Quantitative Psychology, University of Barcelona, Barcelona, Spain

bInstitute of Neurosciences, University of Barcelona, Barcelona, Spain

cHospital Benito Menni CASM, Sisters Hospitallers, Sant Boi de Llobregat, Spain

dDepartment of Psychiatry, International University of Catalonia, Barcelona, Spain

* Address for correspondence: Juana Gómez-Benito, Departamento de Psicología social y Psicología cuantitativa, Facultad de Psicología, Universidad de Barcelona, Passeig de la Vall d’Hebron 171, 08035-Barcelona (Spain). Phone +34 933125082, fax: +34 934021359; E-mail: [juanagomez@ub.edu](mailto:juanagomez@ub.edu)

**Data collection**

The following separate searches were performed:

1. Electronic databases were searched using Boolean operators. The search strategy was as follows:

Databases: PsycINFO

Data searched: August 26 2017

Search terms: ((Title: schiz* OR Title: psychotic OR Title: psychosis) OR (Title: severe mental illness) OR (Title: severe mental disorder) OR (Title: serious mental illness) OR (Title: serious mental disorder)) AND ((Title: employ* OR Title: occupation OR Title: job OR Title: work OR Title: placement)) AND ((Abstract: support OR Abstract: supports OR Abstract: need OR Abstract: needs))

Results: 158 documents

Database: Medline and Web of Science

Data searched: August 26 2017

Search terms: Title: ((schiz* OR psychotic OR psychosis OR (severe mental illness) OR (severe mental disorder) OR (serious mental illness) OR (serious mental disorder) AND Title: ((employ*) OR occupation OR job OR work OR placement)) AND Topic: ((support) OR supports OR need) OR needs)).

Result: 887 documents

Database: Scopus

Data searched: August 30 2017

Search terms: Title: ("schiz*" OR "psychotic" OR "psychosis" OR "severe mental illness" OR "severe mental disorder" OR "serious mental illness" OR "serious mental disorder") AND Title: ("employ*" OR "occupation" OR "job" OR "work" OR "placement") AND Abstract: ("support" OR "supports" OR "need" OR "needs").

Results: 254 records

Database: CINAHL

Data searched: August 30 2017

Search terms: Title: (((schiz* OR psychotic OR psychosis) OR (severe mental illness) OR (severe mental disorder) OR (serious mental illness) OR (serious mental disorder))) AND Title: (((employ* OR occupation OR job OR work OR placement))) AND Abstract: ((support OR supports OR need OR needs)).

Results: 126 documents

A list was created of 1425 potentially relevant documents retrieved from electronic databases: 126 from CINAHL, 422 from Medline, 158 from PsycINFO, 254 from Scopus and 465 from Web of Science. The removal of 586 duplicates gave a total of 839 abstracts, of which 783 did not meet the inclusion criteria. A total of 56 documents were retrieved from the database search.

1. We reviewed the reference lists of meta-analyses and review articles; 2 additional relevant papers were obtained.
2. Relevant journals, including Cult Med Psychiatry, Int J Occup Med Environ Health, Int J Soc Psychiatry, J Ment Health, J Vocat Rehabil., Psychiatr Q, Psychiatr Rehabil J, Psychiatry, Psychiatry Res, Scand J Caring Sci, Schizophr Res, Schizophr Res Treatment, Soc Psychiatry Psychiatr Epidemiol, Work, Work Occup were individually searched online from June until August.
